# Supplementary material for: Ultrasmall RuO2/CoFe2O4 nanoparticles with robust interfacial interactions for the enhanced acidic oxygen evolution reaction
Source: Royal Society of Chemistry journal article supplement (doi:10.1039/d4cy00719k), 2024-01-01
Supplement: d4cy00719k1.pdf [file d4cy00719k1.pdf]

Supplementary Information for

**Ultrasmall Nanoparticles with Strong Interfacial Interactions for  
Enhanced Acidic Oxygen Evolution Reaction**

*Ming Wei<sup>a,b</sup>, Liuhua Mu<sup>b,c</sup>, Zhiwei Liu<sup>b</sup>, Feng Gao<sup>b</sup>, Guangjian Song<sup>a,b</sup>, Qiankang Si<sup>b</sup>,  
Mao Zhang<sup>a</sup>, Fangfang Dai<sup>b</sup>, Min Zhang<sup>b</sup>, Rui Ding<sup>b</sup>, Li Yang<sup>\*a</sup>, Zhonggui Gao<sup>\*a</sup>,  
Sanzhao Song<sup>\*b</sup>*

<sup>a</sup> College of Physics and Technology, Guangxi Normal University, Guilin, 541004,  
China

<sup>b</sup> Wenzhou Institute, University of Chinese Academy of Sciences, Wenzhou, Zhejiang  
325001, China

<sup>c</sup> School of Physical Science, University of Chinese Academy of Sciences, Beijing  
100049, China

\*Corresponding Author.

E-mail: [songsanzhao@ucas.ac.cn](mailto:songsanzhao@ucas.ac.cn) (S. S.);

Email: [gaozhg3@mailbox.gxnu.edu.cn](mailto:gaozhg3@mailbox.gxnu.edu.cn) (Z. G.);

Email: [yangli@mailbox.gxnu.edu.cn](mailto:yangli@mailbox.gxnu.edu.cn) (L. Y.);

## **Supporting Experimental Section**

### **Chemicals**

Iron chloride ( $\text{FeCl}_3$ ,  $\geq 99.99\%$ , Aladdin), Ruthenium (III) chloride hydrate ( $\text{RuCl}_3 \cdot \text{H}_2\text{O}$ ,  $\geq 99.99\%$ , Macklin), Cobalt chloride hexahydrate ( $\text{CoCl}_2 \cdot 6\text{H}_2\text{O}$ ,  $\geq 99.99\%$ , Aladdin), Nafion solution ( $\sim 5$  wt% in a mixture of lower aliphatic alcohols and water, Aldrich), sulfuric acid ( $\text{H}_2\text{SO}_4$ , 95.0%~98.0%). All chemicals were used without further purification directly after purchase. Ultrapure water ( $18.25 \text{ M}\Omega \cdot \text{cm}$ ) produced by the purification system (Ulupure, Sichuan of China) was used for all solutions prepared in the experiments.

### **Physicochemical characterizations**

#### **X-ray diffraction (XRD)**

The crystal structures of the synthesized catalysts were analyzed using X-ray diffraction (XRD). The diffraction patterns were obtained with a Bruker D8 Advance X-ray diffractometer (Germany), utilizing nickel-filtered Cu  $K\alpha$  radiation ( $\lambda = 1.54178 \text{ \AA}$ ). The scanning parameters were set with a  $2\theta$  range of  $10$ - $80^\circ$ , a step size of  $0.02^\circ$ , and the instrument was operated at  $40 \text{ kV}$  and  $40 \text{ mA}$ .

#### **Raman measurements**

Raman spectra were recorded using an in Via Raman microscope (Renishaw) equipped with a  $633 \text{ nm}$  excitation laser. The acquisition time for each scan was set to  $10$  seconds, with a spectral range of  $100$ - $1000 \text{ cm}^{-1}$ , and the laser power was maintained at  $10\%$ .

#### **Scanning electron microscopy (SEM)**

Scanning electron microscopy (SEM) was acquired on a SU8010 (Hitachi) with an accelerating voltage of  $10 \text{ kV}$  and a current of  $10 \mu\text{A}$ . An ethanol dispersion of catalysts was dripped onto the silicon wafer and dried naturally before being used for SEM measurements.

### **Transmission electron microscopy (TEM)**

Transmission electron microscopy (TEM) was acquired on a Talos F200S (Thermo Fisher Scientific) with an accelerating voltage of 200 kV. An ethanol dispersion of catalysts was dripped onto a carbon-coated bicopper grid and then dried naturally for TEM measurements.

### **N<sub>2</sub> Adsorption-Desorption Isotherm and BET Analysis**

The specific surface area of the catalysts was determined using a McMurray Tick surface characterization analyzer (3 Flex) via nitrogen (N<sub>2</sub>) adsorption-desorption isotherms. Measurements were conducted at 77.3 K, with N<sub>2</sub> as the adsorbate. The samples underwent pretreatment at 50 °C for 8 hours prior to analysis.

### **X-ray photoelectron spectra (XPS)**

XPS measurements were performed using an ESCALAB Xi+ spectrometer (Thermo Fischer). The instrument utilized a monochromatic Al K $\alpha$  X-ray source with an energy of 1486.6 eV, operating at a voltage of 12.5 kV and a filament current of 16 mA. The survey spectrum was collected with a pass energy of 100 eV, while the high-resolution spectrum was recorded with a pass energy of 20 eV. The base pressure in the analysis chamber was maintained at  $8 \times 10^{-10}$  mbar during measurements. All binding energies were referenced to the C 1s peak at 284.8 eV.

### **Electrochemical measurements of OER activities**

All electrochemical measurements were conducted using a CHI 760E electrochemical analyzer (Chenhua, Shanghai) at room temperature. A standard three-electrode setup was used, with carbon paper as the working electrode (WE). The catalyst ink was prepared by dispersing 5 mg of electrocatalyst in 200  $\mu$ L deionized water, 250  $\mu$ L ethanol, and 50  $\mu$ L of 5 wt% Nafion solution, followed by sonication for 60 minutes. A 100  $\mu$ L aliquot of the ink was drop-cast onto a 1 cm  $\times$  1 cm carbon paper substrate (Toray Industries, Japan) and allowed to dry naturally. A saturated calomel electrode

(SCE) and a graphite rod were used as the reference electrode (RE) and counter electrode (CE), respectively. All potentials were referenced to the reversible hydrogen electrode (RHE) using the equation:

$$E \text{ (vs. RHE)} = E \text{ (vs. SCE)} + 0.0591 \times \text{pH} + 0.24 \text{ V}$$

The electrolyte used was 0.5 M H<sub>2</sub>SO<sub>4</sub> (80 mL). The catalyst was fully activated using cyclic voltammetry (CV) before measurements. Polarization data were collected using linear sweep voltammetry (LSV) at a scan rate of 5 mV·s<sup>-1</sup>.

Electrochemical impedance spectroscopy (EIS) was performed in the frequency range of 0.1 Hz to 100 kHz with an AC amplitude of 10 mV. The electrochemical active surface area (ECSA) was determined using the CV method, with CV curves recorded at scan rates of 20, 40, 60, 80, 100, and 120 mV·s<sup>-1</sup> within the potential range of 1.06 to 1.16 V vs. RHE, where no Faradaic processes occur. The scan rate was plotted as the horizontal axis and half of the difference between the positive and negative current densities at the center of the scanning potential range (i.e., 1.11 V vs. RHE of the OER) was plotted as the vertical axis, with the slope representing the double-layer capacitance (C<sub>dl</sub>).

Stability tests were conducted using the galvanostatic method at a current density of 10 mA·cm<sup>-2</sup>.

The mass activity (MA) was calculated using the equation:

$$\text{Mass Activity} = j / m.$$

where *j* is the current density (mA·cm<sup>-2</sup>) measured at 1.60 V vs. RHE, and *m* is the catalyst loading (1 mg·cm<sup>-2</sup>).

For overall water splitting, the RFC catalyst was used as the anode in a two-electrode system with a proton exchange membrane (PEM) and commercial 20% Pt/C as the cathode. The electrolyte was 0.5 M H<sub>2</sub>SO<sub>4</sub>. The catalyst was activated using CV before measurements. LSV was performed at a scan rate of 5 mV·s<sup>-1</sup>, and stability tests were conducted using the galvanostatic method at a current density of 10 mA·cm<sup>-2</sup>.

## Supporting Figures.

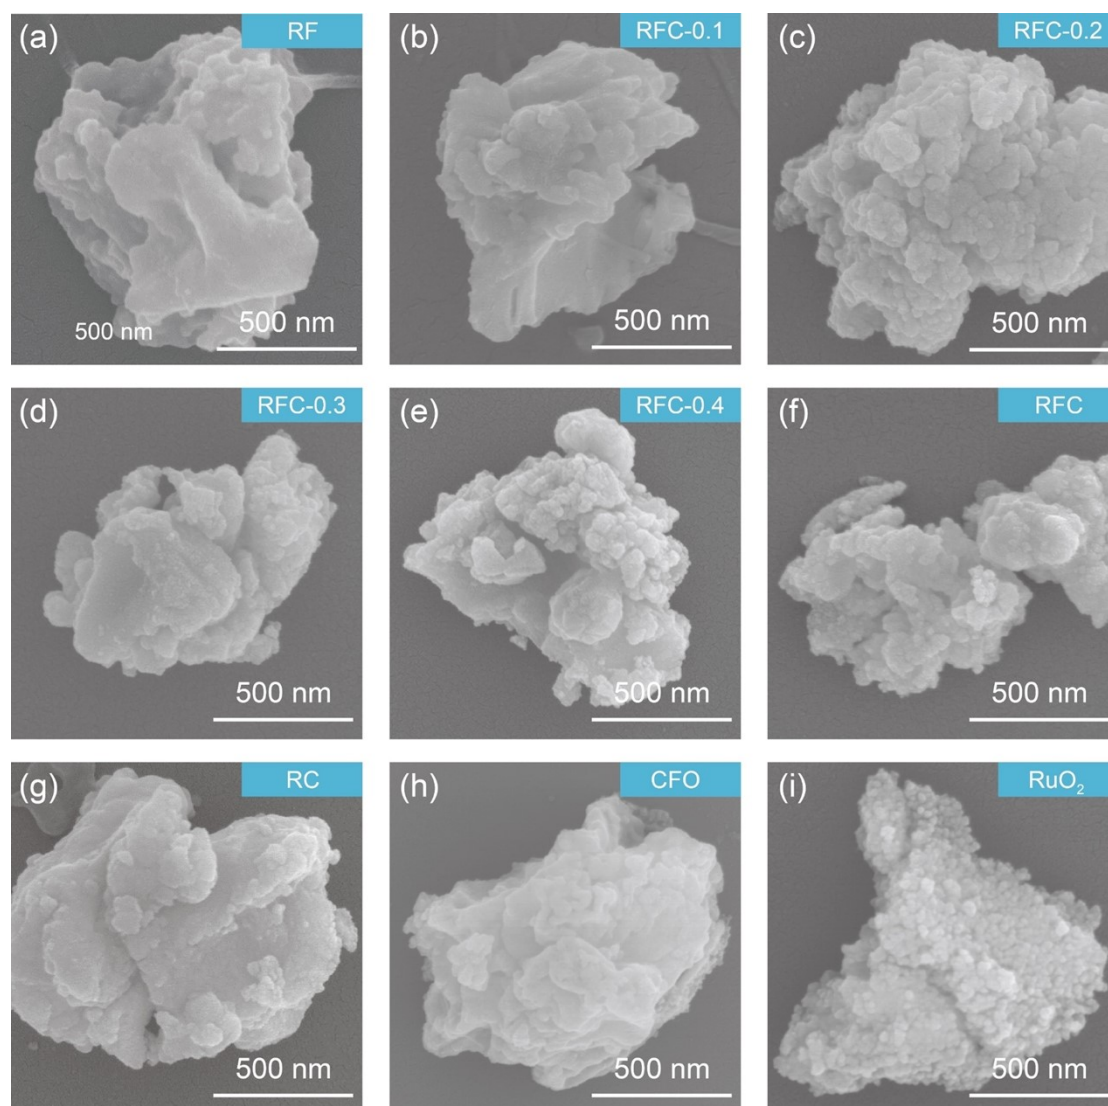

**Fig. S1.** SEM images of catalysts.

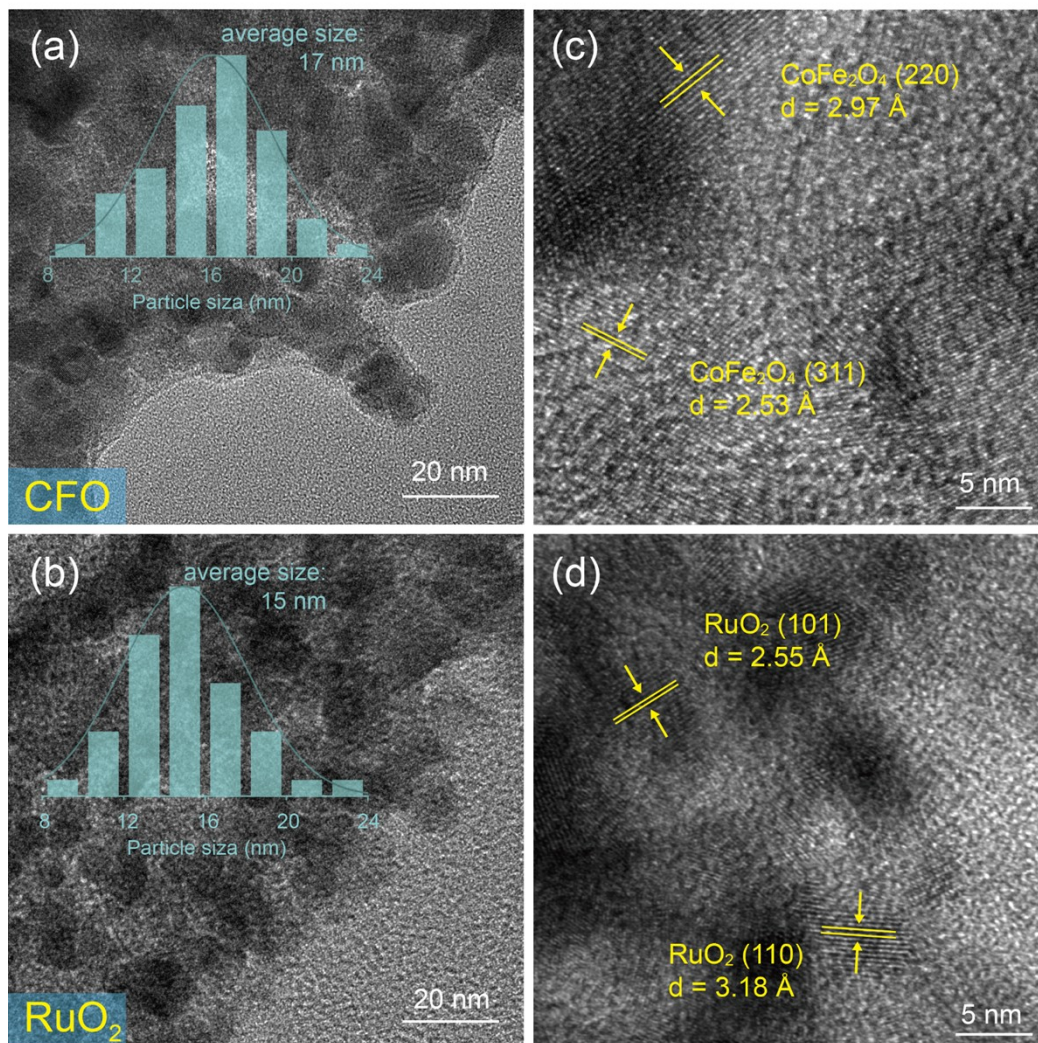

**Fig. S2.** TEM images of (a) CFO and (b) RuO<sub>2</sub>. HRTEM images of (c) CFO and (d) RuO<sub>2</sub>.

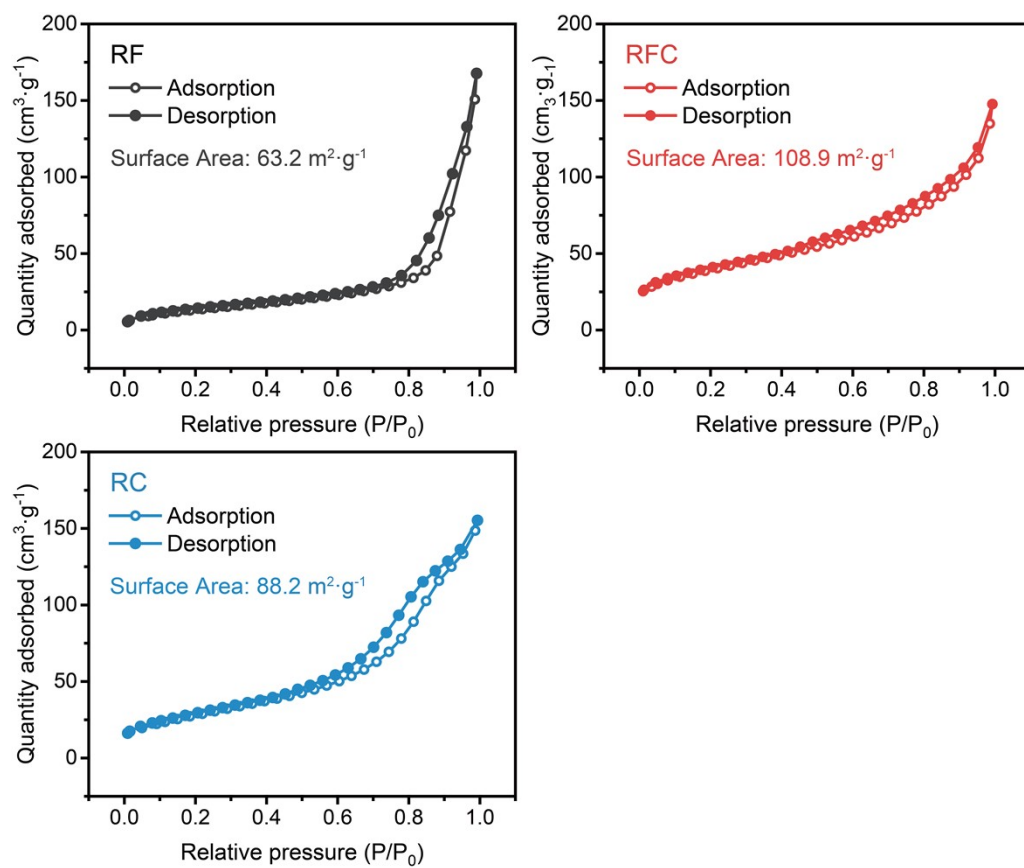

**Fig. S3.** Nitrogen Adsorption-desorption isotherm curve of catalysts.

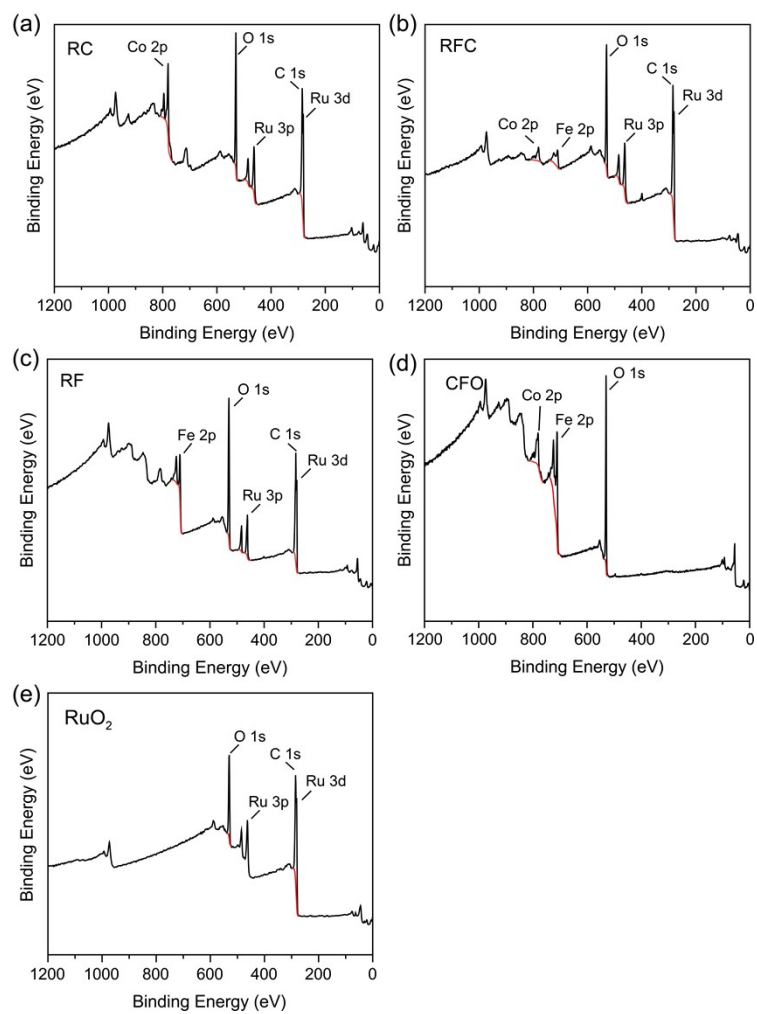

**Fig. S4.** XPS survey spectra of catalysts.



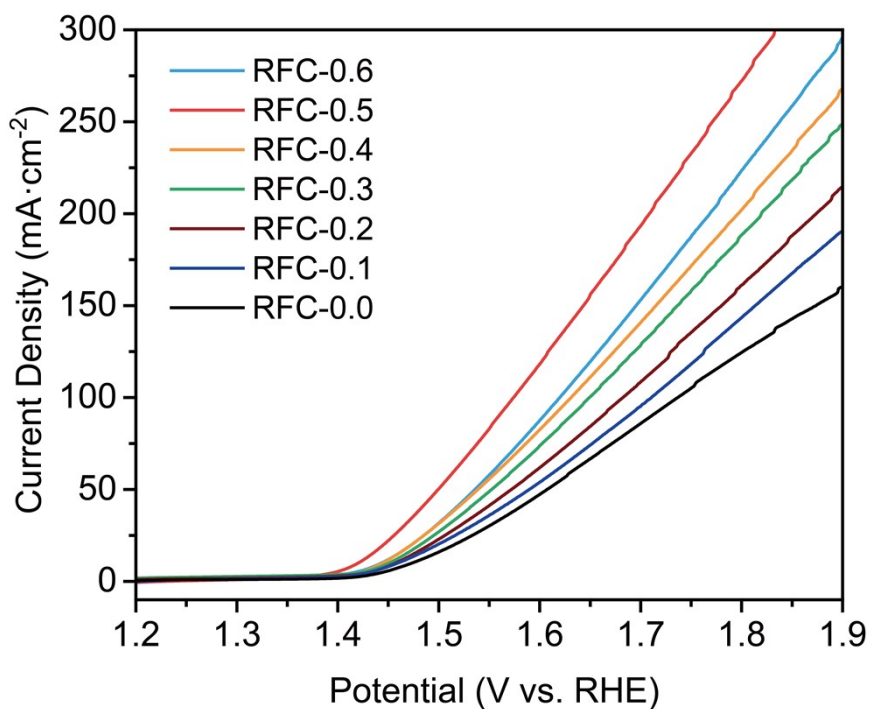

**Fig. S5.** LSV curves of RFC catalysts with different concentrations of  $\text{Co}^{2+}$ .

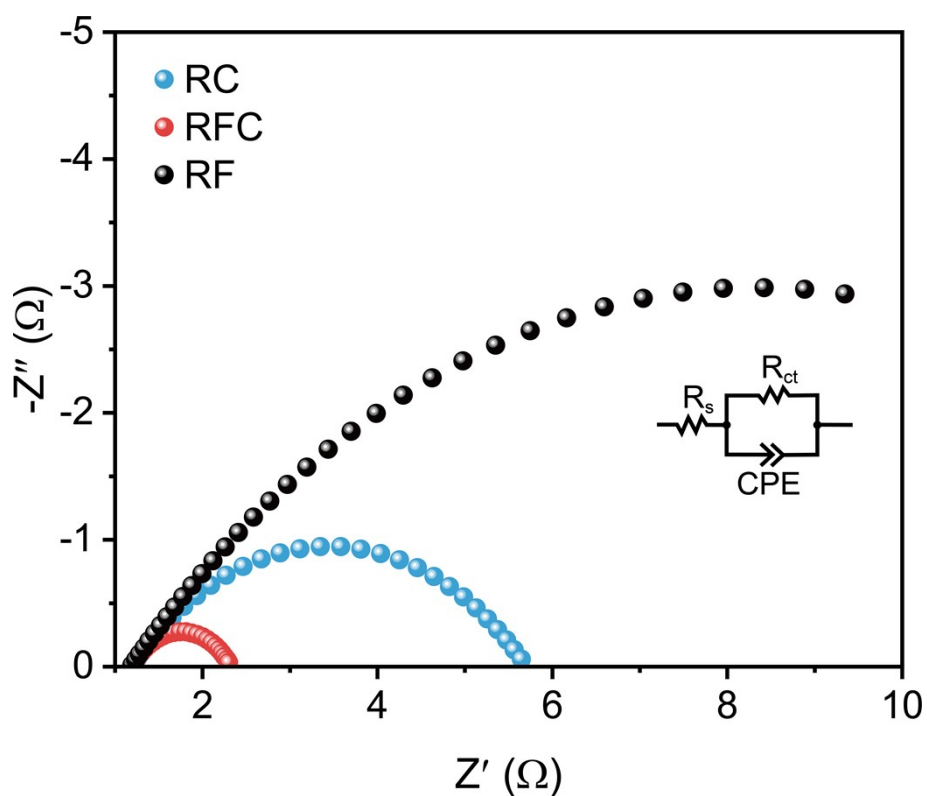

**Fig. S6.** EIS Nyquist plots of catalysts at a potential of 1.40 V (vs. RHE).

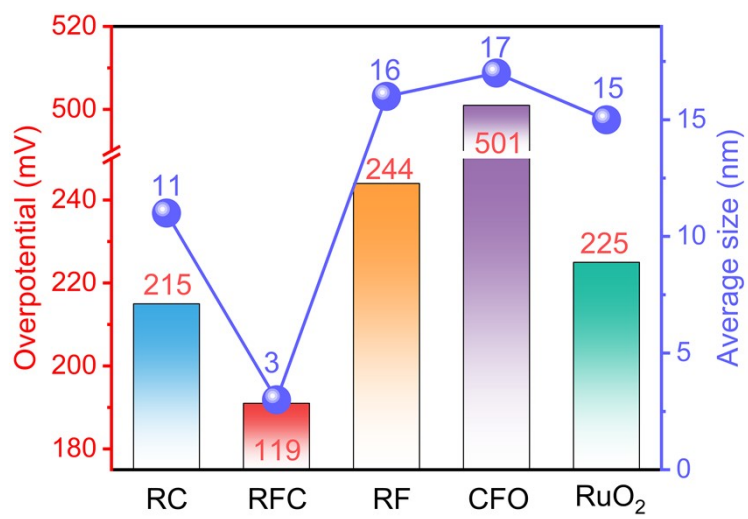

**Fig. S7.** Comparison of the overpotentials at  $10 \text{ mA cm}^{-2}$  and average particle sizes for different catalysts.

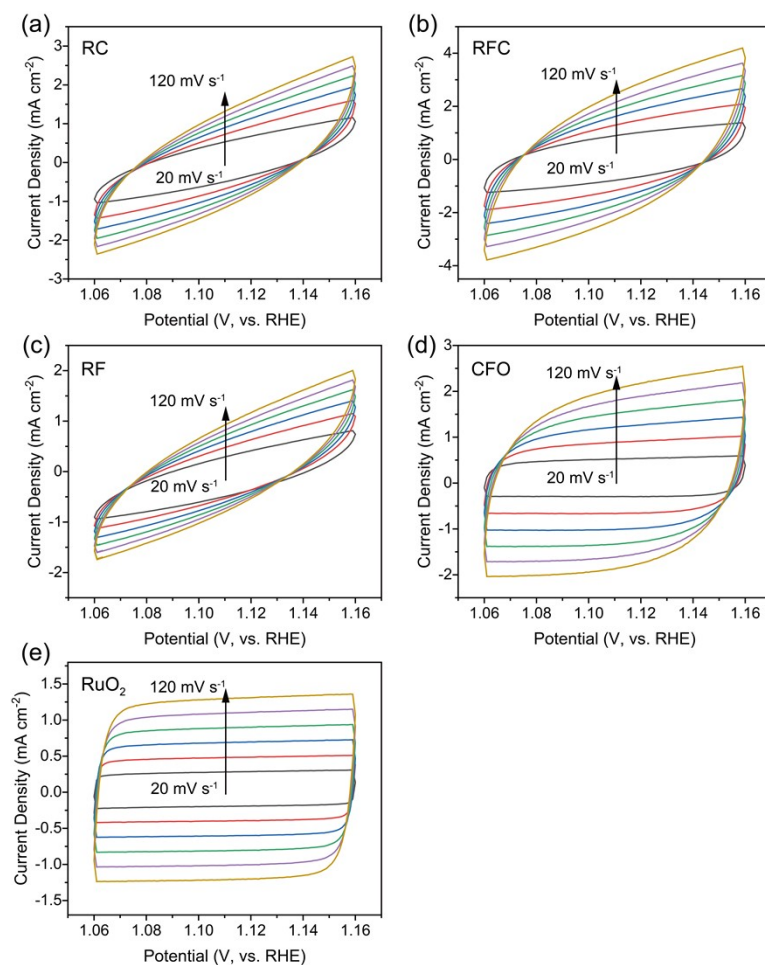

**Fig. S8.** Electrochemical active surface area (ECSA) analyses of catalysts according to the CV at different sweep speed of in a potential window (1.06~1.16 V vs. RHE) where no Faradaic processes occur for catalysts.

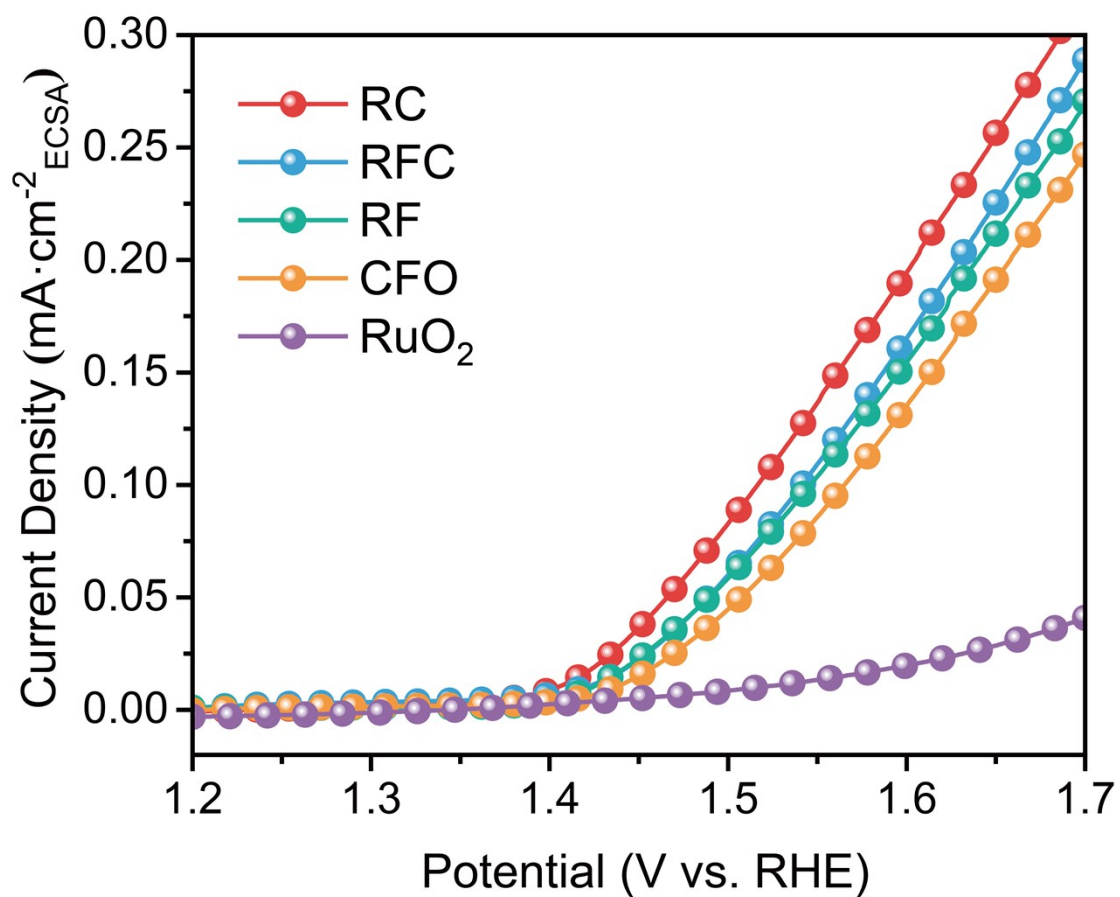

**Fig. S9.** Linear sweep voltammetry (LSV) curves normalized to ECSA for the oxygen evolution reaction (OER) in 0.5 M H<sub>2</sub>SO<sub>4</sub>.

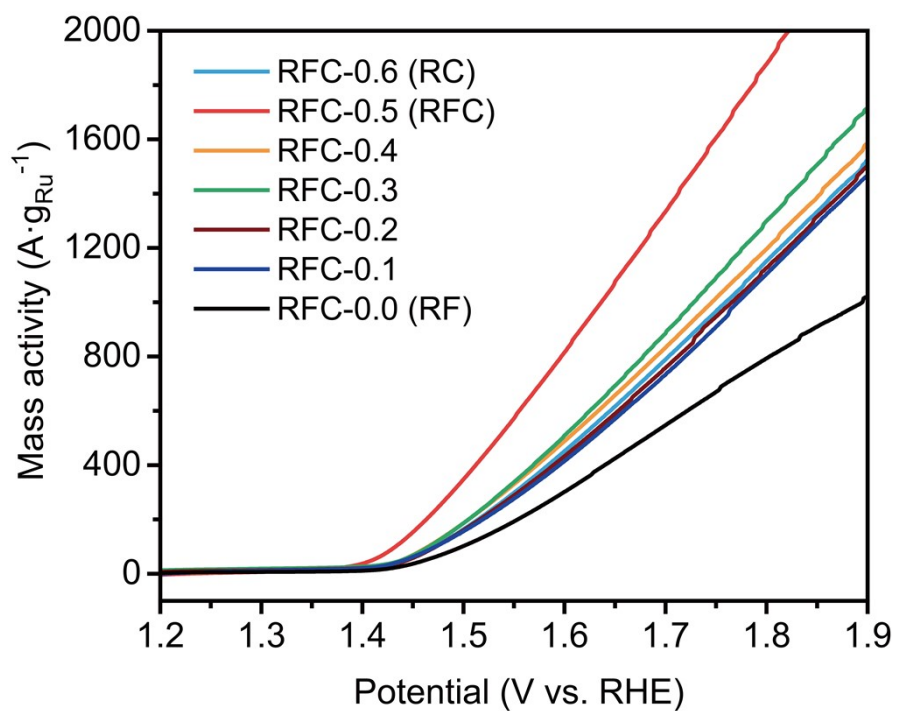

**Fig. S10.** Mass Activity-Normalized Linear Sweep Voltammetry (LSV) Curves.

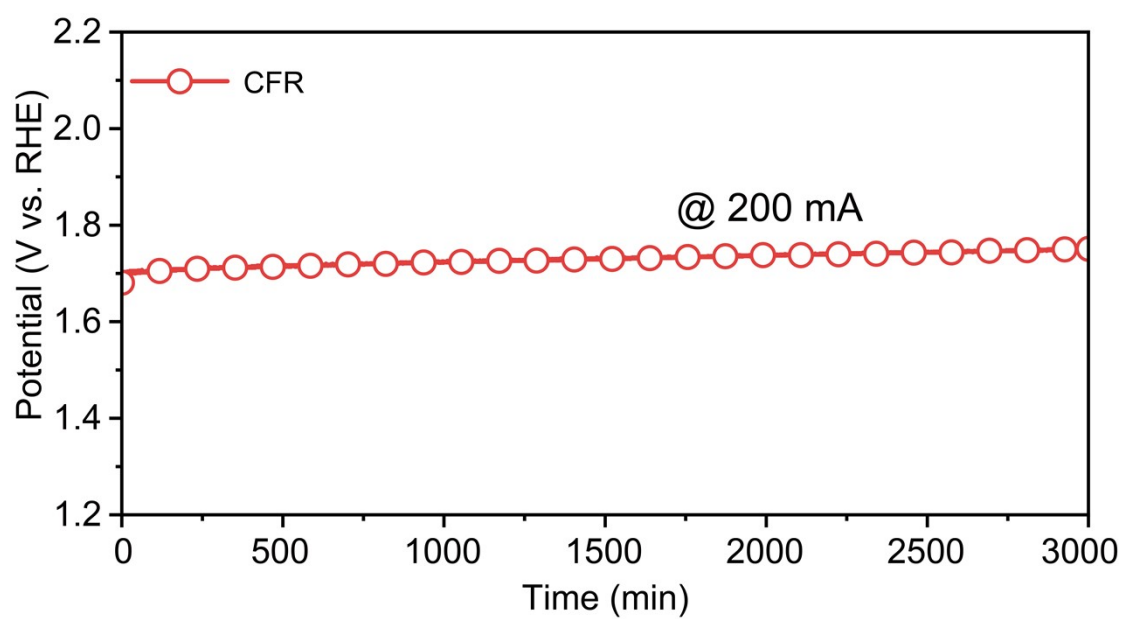

**Fig. S11.** Stability test of catalysts at 200 mA cm<sup>-2</sup>.

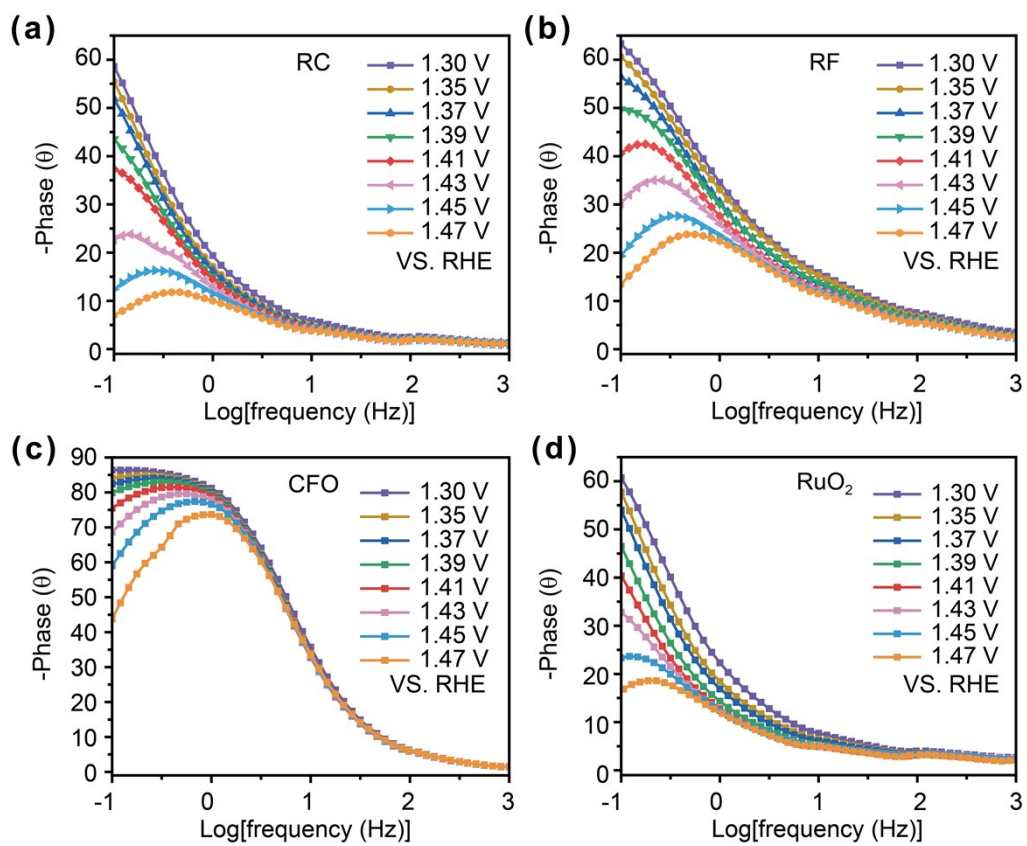

**Fig. S12.** Bode phase plots of (a) RC, (b) RF, (c) CFO and (d) RuO<sub>2</sub>

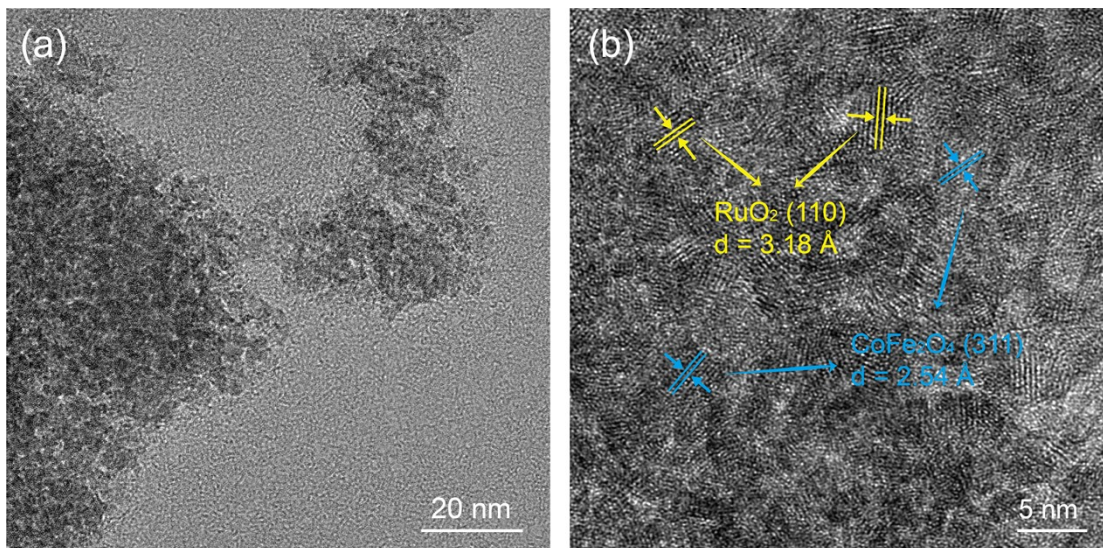

**Fig. S13.** TEM images of RFC catalyst after stability test.

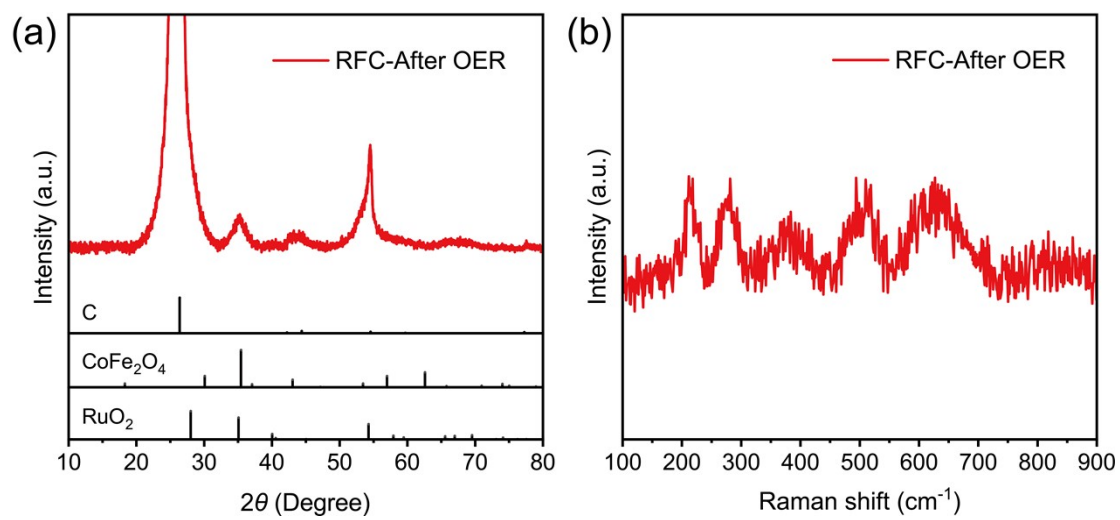

**Fig. S14** (a) XRD spectra and (b) Raman spectra of the RFC catalyst after stability test.



## Supporting Tables

**Table S1.** Name of catalyst and ion concentration of precursor during preparation.

| C                     | Co <sup>2+</sup> (ppm) | Fe <sup>3+</sup> (ppm) | Ru <sup>3+</sup> (ppm) |
|-----------------------|------------------------|------------------------|------------------------|
| RFC-0.0 ( <b>RF</b> ) | 0                      | 600                    | 300                    |
| RFC-0.1               | 100                    | 500                    | 300                    |
| RFC-0.2               | 200                    | 400                    | 300                    |
| RFC-0.3               | 300                    | 300                    | 300                    |
| RFC-0.4               | 400                    | 200                    | 300                    |
| RFC-0.5 ( <b>RF</b> ) | 500                    | 100                    | 300                    |
| RFC-0.6 ( <b>RC</b> ) | 600                    | 0                      | 300                    |

**Table S2.** Elemental composition in weight percentages (wt%) as measured by ICP-MS.

| <b>Sample</b>          | <b>Co (wt %)</b> | <b>Ru ( wt %)</b> | <b>Fe ( wt %)</b> |
|------------------------|------------------|-------------------|-------------------|
| RFC-0.0 ( <b>RF</b> )  | 0.0              | 15.7              | 85.3              |
| RFC-0.1                | 7.8              | 12.3              | 79.9              |
| RFC-0.2                | 10.6             | 14.1              | 75.3              |
| RFC-0.3                | 15.3             | 15.8              | 68.9              |
| RFC-0.4                | 19.7             | 17.6              | 62.7              |
| RFC-0.5 ( <b>RFC</b> ) | 28.2             | 14.5              | 57.3              |
| RFC-0.6 ( <b>RC</b> )  | 80.6             | 19.4              | 0.0               |

**Table S3:** Elemental composition in Atomic Percentages (at%) as measured by ICP-MS.

| <b>Sample</b>          | <b>Co (at %)</b> | <b>Ru (at %)</b> | <b>Fe (at %)</b> |
|------------------------|------------------|------------------|------------------|
| RFC-0.0 ( <b>RF</b> )  | 0.0              | 25.0             | 75.0             |
| RFC-0.1                | 7.5              | 20.1             | 72.4             |
| RFC-0.2                | 10.0             | 22.8             | 67.2             |
| RFC-0.3                | 14.2             | 25.2             | 60.6             |
| RFC-0.4                | 18.0             | 27.6             | 54.4             |
| RFC-0.5 ( <b>RFC</b> ) | 26.3             | 23.2             | 50.6             |
| RFC-0.6 ( <b>RC</b> )  | 70.8             | 29.2             | 0.0              |

**Table S4.** Different oxygen content in the catalyst.

| Samples          | O <sub>1</sub> (%) | O <sub>2</sub> (%) | O <sub>3</sub> (%) |
|------------------|--------------------|--------------------|--------------------|
| RC               | 55                 | 30                 | 15                 |
| RFC              | 36                 | 45                 | 19                 |
| RF               | 47                 | 41                 | 12                 |
| CFO              | 66                 | 19                 | 14                 |
| RuO <sub>2</sub> | 41                 | 43                 | 16                 |

**Table S5.** Ruthenium (Ru) Load on 1 cm<sup>2</sup> Carbon Paper Electrodes for Different Catalyst Samples

| <b>Sample</b>          | <b>Ru Load (mg)</b> |
|------------------------|---------------------|
| RFC-0.0 ( <b>RF</b> )  | 0.157               |
| RFC-0.1                | 0.123               |
| RFC-0.2                | 0.141               |
| RFC-0.3                | 0.158               |
| RFC-0.4                | 0.176               |
| RFC-0.5 ( <b>RFC</b> ) | 0.145               |
| RFC-0.6 ( <b>RC</b> )  | 0.194               |

**Table S6.** Comparative evaluation of recently reported Ru-based electrocatalysts in acidic media.

| Catalyst                                                          | Overpotential (mV)<br>@10mA cm <sup>-2</sup> | Stability<br>@10 mA cm <sup>-2</sup>          | Ref.                                          |
|-------------------------------------------------------------------|----------------------------------------------|-----------------------------------------------|-----------------------------------------------|
| Fe <sub>2</sub> O <sub>3</sub> @RuO <sub>2</sub>                  | 191                                          | 100 h<br>3000 min @200 mA<br>cm <sup>-2</sup> | <b>This work</b>                              |
| C-RuO <sub>2</sub> -RuSe                                          | 212                                          | 50                                            | Chem 2022, 8, 1673-1687                       |
| RuO <sub>2</sub> -WC NPs                                          | 347                                          | 10                                            | Angew. Chem. Int. Ed. 2022, 61, e20220251911  |
| Na-a/c-RuO <sub>2</sub>                                           | 205                                          | 60                                            | Angew. Chem. Int. Ed. 2021, 60, 18821-18829   |
| Ru/RuS <sub>2</sub>                                               | 201                                          | 24                                            | Angew. Chem. Int. Ed. 2021, 60, 12328-1233423 |
| Y <sub>1.7</sub> Sr <sub>0.3</sub> Ru <sub>2</sub> O <sub>7</sub> | 264                                          | 28                                            | ACS Nano 2021, 15, 8537-8548                  |
| RuIr@CoNC                                                         | 223                                          | 40                                            | ACS Catal. 2021, 11, 3402-3413                |
| CaCu <sub>3</sub> Ru <sub>4</sub> O <sub>12</sub>                 | 273                                          | 59                                            | Small 2022, 18, 2202439                       |
| RuO <sub>2</sub><br>nanowires                                     | 224                                          | 12                                            | Adv. Funct. Mater. 2021, 31, 2007344          |
| Zn-doped<br>RuO <sub>2</sub>                                      | 206                                          | 30                                            | ChemNanoMat 2021, 7, 117-121                  |
| Ru@IrOx                                                           | 282                                          | 24                                            | Chem 2019, 5, 445                             |
| B-RuO <sub>2</sub>                                                | 200                                          | 40                                            | Nano Res. 2022, 15, 7008                      |
